# Supplementary material for: Machine learning method aided discovery of the fourth-generation EGFR inhibitors
Source: Royal Society of Chemistry journal article supplement (doi:10.1039/d3nj03204c), 2023-01-01

Table S1. The references of the data set.

| NO. | Reference                                                                                                                                                                                                                                                                                                                                                                                                                                     |
|-----|-----------------------------------------------------------------------------------------------------------------------------------------------------------------------------------------------------------------------------------------------------------------------------------------------------------------------------------------------------------------------------------------------------------------------------------------------|
| 1   | Bin Zhang, Zhikun Liu, Shengjin Xia, Qingqing Liu, Shaohua Gou, Design, synthesis and biological evaluation of sulfamoylphenyl-quinazoline derivatives as potential EGFR/CAIX dual inhibitors, <i>European Journal of Medicinal Chemistry</i> , 2021, 216, 113300.                                                                                                                                                                            |
| 2   | Lixue Chen, Yunhao Zhang, Changyuan Wang, Zeyao Tang, Qiang Meng, Hunjun Sun, Yan Qi, Xiaodong Ma, Lei Li, Yanxia Li, Youjun Xu, Design, synthesis, and biological evaluation of hydroxamic acid-substituted 2,4-diaryl aminopyrimidines as potent EGFR T790M/L858R inhibitors for the treatment of NSCLC, <i>Bioorganic Chemistry</i> , 2021, 114, 105045.                                                                                   |
| 3   | Haiqing Yu, Yanxia Li, Yang Ge, Zhendong Song, Changyuan Wang, Shanshan Huang, Yue Jin, Xu Han, Yuhong Zhen, Kexin Liu, Youwen Zhou, Xiaodong Ma, Novel 4-anilinoquinazoline derivatives featuring an 1-adamantyl moiety as potent EGFR inhibitors with enhanced activity against NSCLC cell lines, <i>European Journal of Medicinal Chemistry</i> , 2016, 110, 195-203.                                                                      |
| 4   | Yuan Zhang, Handeng Lv, Lu Luo, Yong Xu, Yaqian Pan, Yueshuo Wang, Han Lin, Jianhua Xiong, Ping Guo, Jinsan Zhang, Xiaokun Li, Faqing Ye, Design, synthesis and pharmacological evaluation of N4, N6-disubstituted pyrimidine-4,6-diamine derivatives as potent EGFR inhibitors in non-small cell lung cancer, <i>European Journal of Medicinal Chemistry</i> , 2018, 157, 1300-1325.                                                         |
| 5   | Longfei Mao, Ge Sun, Jie Zhao, Guiqing Xu, Miaomiao Yuan, Yue-Ming Li, Design, synthesis and antitumor activity of icotinib derivatives, <i>Bioorganic Chemistry</i> , 2020, 105, 104421.                                                                                                                                                                                                                                                     |
| 6   | Hassanin, M.A.; Mustafa, M.; Abourehab, M.A.S.; Hassan, H.A.; Aly, O.M.; Beshir, E.A.M. Design and Synthesis of New Hydantoin Acetanilide Derivatives as Anti-NSCLC Targeting EGFR <sup>L858R/T790M</sup> Mutations. <i>Pharmaceuticals</i> <b>2022</b> , <i>15</i> , 857.                                                                                                                                                                    |
| 7   | Lingfeng Chen, Weitao Fu, Chen Feng, Rong Qu, Linjiang Tong, Lulu Zheng, Bo Fang, Yinda Qiu, Jie Hu, Yuepiao Cai, Jianpeng Feng, Hua Xie, Jian Ding, Zhiguo Liu, Guang Liang, Structure-based design and synthesis of 2,4-diaminopyrimidines as EGFR L858R/T790M selective inhibitors for NSCLC, <i>European Journal of Medicinal Chemistry</i> , 2017, 140, 510-527.                                                                         |
| 8   | Yongjia Hao, Jiankun Lyu, Rong Qu, Yi Tong, Deheng Sun, Fang Feng, Linjiang Tong, Tingyuan Yang, Zhenjiang Zhao, Lili Zhu, Jian Ding, Yufang Xu, Hua Xie, and Honglin Li, Design, Synthesis, and Biological Evaluation of Pyrimido[4,5-d] pyrimidine-2,4(1H,3H)-diones as Potent and Selective Epidermal Growth Factor Receptor (EGFR) Inhibitors against L858R/T790M Resistance Mutation. <i>J. Med. Chem.</i> 2018, <i>61</i> , 5609- 5622. |
| 9   | Wang, C., Sun, Y., Zhu, X., Wu, B., Wang, Q., Zhen, Y., Shu, X., Liu, K., Zhou, Y. and Ma, X. (2016), Novel Quinazoline Derivatives Bearing Various 4-Aniline Moieties as Potent EGFR Inhibitors with Enhanced Activity Against NSCLC Cell Lines. <i>Chem Biol Drug Des</i> , <i>87</i> : 635-643.                                                                                                                                            |
| 10  | Shaohua Chang, Lianwen Zhang, Shilin Xu, Jinfeng Luo, Xiaoyun Lu, Zhang                                                                                                                                                                                                                                                                                                                                                                       |

|    |                                                                                                                                                                                                                                                                                                                                                                                                                                                            |
|----|------------------------------------------------------------------------------------------------------------------------------------------------------------------------------------------------------------------------------------------------------------------------------------------------------------------------------------------------------------------------------------------------------------------------------------------------------------|
|    | Zhang, Tianfeng Xu, Yingxue Liu, Zhengchao Tu, Yong Xu, Xiaomei Ren, Meiyu Geng, Jian Ding, Duanqing Pei, and Ke Ding, Design, Synthesis, and Biological Evaluation of Novel Conformationally Constrained Inhibitors Targeting Epidermal Growth Factor Receptor Threonine790 → Methionine790 Mutant. <i>J. Med. Chem.</i> 2012, 55, 2711-2723.                                                                                                             |
| 11 | Zhen Xiao, Cilong Chu, Lingjia Zhou, Zhihui Zhou, Qian Zhang, Feiyi Yang, Zunhua Yang, Pengwu Zheng, Shan Xu, Wufu Zhu, Discovery of thiapyran-pyrimidine derivatives as potential EGFR inhibitors, <i>Bioorganic &amp; Medicinal Chemistry</i> , 2020, 28, 115669.                                                                                                                                                                                        |
| 12 | Zheng Wang, Xue Wu, Li Wang, Jiao Zhang, Jianli Liu, Zhongxing Song, Zhishu Tang, Facile and efficient synthesis and biological evaluation of 4-anilinoquinazoline derivatives as EGFR inhibitors, <i>Bioorganic &amp; Medicinal Chemistry Letters</i> , 2016, 26, 2589-2593.                                                                                                                                                                              |
| 13 | Bin Zhang, Zichen Xu, Qingqing Liu, Shengjin Xia, Zhikun Liu, Zhixin Liao, Shaohua Gou, Design, synthesis and biological evaluation of cinnamamide-quinazoline derivatives as potential EGFR inhibitors to reverse T790M mutation, <i>Bioorganic Chemistry</i> , 2021, 117, 105420.                                                                                                                                                                        |
| 14 | Zhihui Zhou, Jie He, Feiyi Yang, Qingshan Pan, Zunhua Yang, Pengwu Zheng, Shan Xu, Wufu Zhu, Design, synthesis and evaluation of anti-proliferative activity of 2-aryl-4-aminoquinazoline derivatives as EGFR inhibitors, <i>Bioorganic Chemistry</i> , 2021, 112, 104848.                                                                                                                                                                                 |
| 15 | Chun Han, Zhangjian Huang, Chao Zheng, Ledong Wan, Yisheng Lai, Sixun Peng, Ke Ding, Hongbin Ji, Yihua Zhang, Nitric oxide donating anilinopyrimidines: Synthesis and biological evaluation as EGFR inhibitors, <i>European Journal of Medicinal Chemistry</i> , 2013, 66, 82-90.                                                                                                                                                                          |
| 16 | Yaqing Zuo, Rongrong Li, Yan Zhang, Guochen Bao, Yi Le, Longjia Yan. Design, synthesis and antitumor activity of 5-trifluoromethylpyrimidine derivatives as EGFR inhibitors. <i>Journal of Enzyme Inhibition and Medicinal Chemistry</i> , 2022, 37, 2742-2754.                                                                                                                                                                                            |
| 17 | Hao Y, Lyu J, Qu R, et al. Structure-guided design of C4-alkyl-1, 4-dihydro-2H-pyrimido [4, 5-d] [1, 3] oxazin-2-ones as potent and mutant-selective epidermal growth factor receptor (EGFR) L858R/T790M inhibitors. <i>Sci Rep</i> , 2017, 7, 1-13.                                                                                                                                                                                                       |
| 18 | Julian Engel, Steven Smith, Jonas Lategahn, Hannah L. Tumbrink, Lisa Goebel, Christian Becker, Elisabeth Hennes, Marina Keul, Anke Unger, Heiko Müller, Matthias Baumann, Carsten Schultz-Fademrecht, Georgia Günther, Jan G. Hengstler, and Daniel Rauh, Structure-Guided Development of Covalent and Mutant-Selective Pyrazolopyrimidines to Target T790M Drug Resistance in Epidermal Growth Factor Receptor, <i>J. Med. Chem.</i> 2017, 60, 7725-7744. |
| 19 | Hao Zhang, Jin Wang, Hong-Yi Zhao, Xue-Yan Yang, Hao Lei, Minhong Xin, Yong-Xiao Cao, San-Qi Zhang, Synthesis and biological evaluation of irreversible EGFR tyrosine kinase inhibitors containing pyrido[3,4-d] pyrimidine scaffold, <i>Bioorganic &amp; Medicinal Chemistry</i> , 2018, 26, 3619-3633.                                                                                                                                                   |
| 20 | Baijiao An, Jian Liu, Yangyang Fan, Wenyan Nie, Chunhua Yang, Han Yao,                                                                                                                                                                                                                                                                                                                                                                                     |

|    |                                                                                                                                                                                                                                                                                                                                                                                                                                                                              |
|----|------------------------------------------------------------------------------------------------------------------------------------------------------------------------------------------------------------------------------------------------------------------------------------------------------------------------------------------------------------------------------------------------------------------------------------------------------------------------------|
|    | Wei Li, Yin Zhang, Xingshu Li, Geng Tian, Novel third-generation pyrimidines-based EGFR tyrosine kinase inhibitors targeting EGFR T790M mutation in advanced non-small cell lung cancer, <i>Bioorganic Chemistry</i> , 2022, 122, 105743.                                                                                                                                                                                                                                    |
| 21 | Haikui Yang, Ruohong Yan, Ying Jiang, Zichao Yang, Xingmei Zhang, Mingfeng Zhou, Xiaoyun Wu, Tingting Zhang, Jiajie Zhang, Design, synthesis and biological evaluation of 2-amino-4-(1,2,4-triazol) pyridine derivatives as potent EGFR inhibitors to overcome TKI-resistance, <i>European Journal of Medicinal Chemistry</i> , 2020, 187, 111966.                                                                                                                           |
| 22 | Chun Han, Zhangjian Huang, Chao Zheng, Ledong Wan, Lianwen Zhang, Sixun Peng, Ke Ding, Hongbin Ji, Jide Tian, and Yihua Zhang, Novel Hybrids of (Phenylsulfonyl)furoxan and Anilinopyrimidine as Potent and Selective Epidermal Growth Factor Receptor Inhibitors for Intervention of Non-Small-Cell Lung Cancer. <i>J. Med. Chem.</i> 2013, 56, 4738-4748.                                                                                                                  |
| 23 | Zhang, D, Yan, Y, Jin, G, et al. Synthesis and antitumor evaluation of novel 4-anilino-7,8-dihydropyrido[4,3- <i>d</i> ] pyrimidine-6(5 <i>H</i> )-carboxylate derivatives as potential EGFR inhibitors. <i>Arch Pharm Chem Life Sci.</i> 2018, 351, 1800110.                                                                                                                                                                                                                |
| 24 | Shilin Xu, Tianfeng Xu, Lianwen Zhang, Zhang Zhang, Jinfeng Luo, Yingxue Liu, Xiaoyun Lu, Zhengchao Tu, Xiaomei Ren, and Ke Ding, Design, Synthesis, and Biological Evaluation of 2-Oxo-3,4-dihydropyrimido[4,5- <i>d</i> ] pyrimidinyl Derivatives as New Irreversible Epidermal Growth Factor Receptor Inhibitors with Improved Pharmacokinetic Properties. <i>J. Med. Chem.</i> 2013, 56, 8803-8813.                                                                      |
| 25 | Mingze Qin, Tingting Wang, Boxuan Xu, Zonghui Ma, Nan Jiang, Hongbo Xie, Ping Gong, Yanfang Zhao, Novel hydrazone moiety-bearing aminopyrimidines as selective inhibitors of epidermal growth factor receptor T790M mutant, <i>European Journal of Medicinal Chemistry</i> , 2015, 104, 115-126.                                                                                                                                                                             |
| 26 | Qiao Liu, Yanli Luo, Zerui Li, Chen Chen, Lei Fang, Structural modifications on indole and pyrimidine rings of osimertinib lead to high selectivity towards L858R/T790M double mutant enzyme and potent antitumor activity, <i>Bioorganic &amp; Medicinal Chemistry</i> , 2021, 36, 116094.                                                                                                                                                                                  |
| 27 | Riccardo Castelli, Nicole Bozza, Andrea Cavazzoni, Mara Bonelli, Federica Vacondio, Francesca Ferlenghi, Donatella Callegari, Claudia Silva, Silvia Rivara, Alessio Lodola, Graziana Digiacomo, Claudia Fumarola, Roberta Alfieri, Pier Giorgio Petronini, Marco Mor, Balancing reactivity and antitumor activity: heteroarylthioacetamide derivatives as potent and time-dependent inhibitors of EGFR, <i>European Journal of Medicinal Chemistry</i> , 2019, 162, 507-524. |
| 28 | Ryan P. Wurz, Liping H. Pettus, Kate Ashton, et al. Oxopyrido[2,3- <i>d</i> ] pyrimidines as Covalent L858R/T790M Mutant Selective Epidermal Growth Factor Receptor (EGFR) Inhibitors. <i>ACS Med. Chem. Lett.</i> 2015, 6, 987-992.                                                                                                                                                                                                                                         |

Table S2. Binding energy of the molecular docking.

| No. | Binding energy<br>kJ/mol |
|-----|--------------------------|-----|--------------------------|-----|--------------------------|-----|--------------------------|
| 1   | -32.23                   | 8   | -35.04                   | 15  | -48.47                   | 22  | -35.41                   |
| 2   | -27.29                   | 9   | -34.07                   | 16  | -28.21                   | 23  | -27.50                   |
| 3   | -33.19                   | 10  | -33.19                   | 17  | -36.25                   | 24  | -37.88                   |
| 4   | -27.59                   | 11  | -32.40                   | 18  | -33.24                   | 25  | -32.86                   |
| 5   | -36.69                   | 12  | -28.84                   | 19  | -38.68                   | 26  | -38.26                   |
| 6   | -27.29                   | 13  | -31.48                   | 20  | -29.67                   | 27  | -30.10                   |
| 7   | -33.24                   | 14  | -29.43                   | 21  | -25.74                   | 28  | -32.27                   |

28 compounds were selected to carry out molecular docking in Autodock4. Each molecule underwent 50 molecular docking sessions to find the best binding position. No.15 is the best docking result which shows the highest binding energy -48.47 kJ/mol. And No.5, No.19, No.24, No.26 follow closely behind. The binding energy of all selected compounds is up to -6 Kcal/mol which illustrates the upstanding interaction with EGFR protein.

Figure S1 The descriptors screened by Mutual information and Correlation are listed in Figure. S1. (A) 30 descriptors sorted from highest to lowest were selected by Mutual information. (B) 30 descriptors sorted from highest to lowest were selected by Correlation.

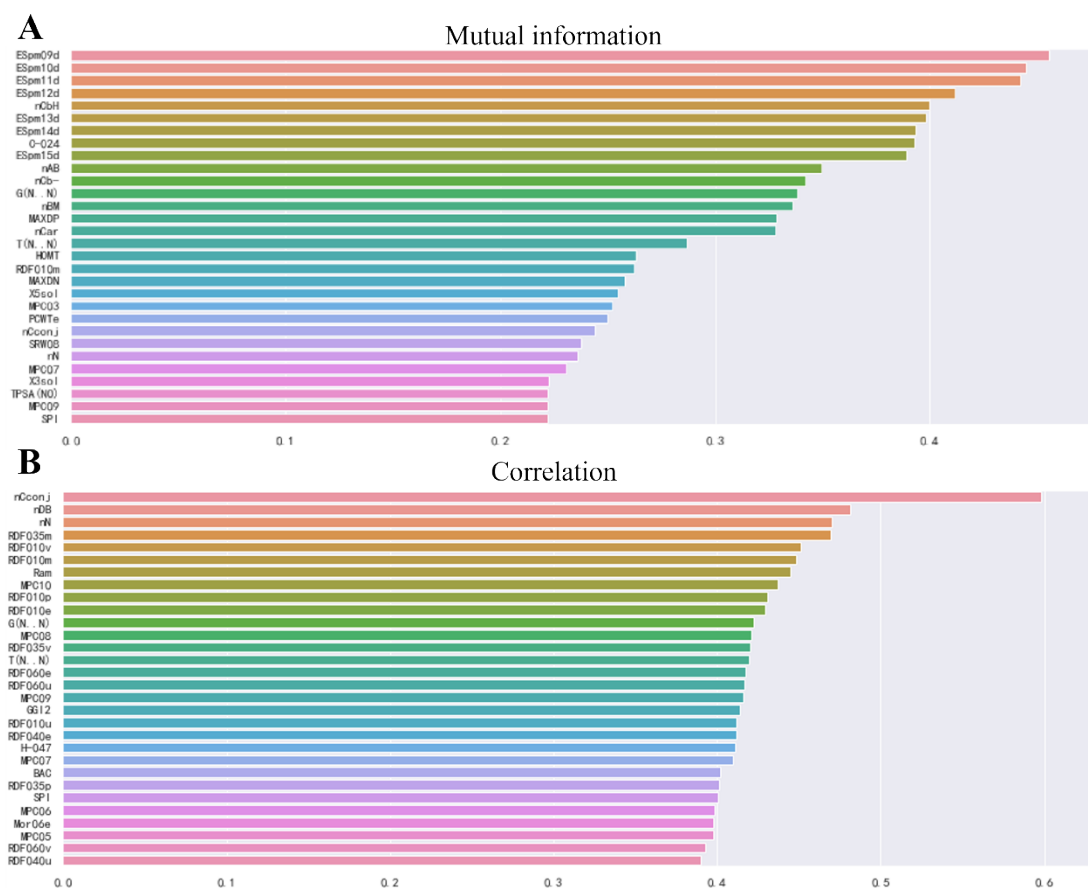

Figure. S2 The two-dimensional scatter plot of the fingerprint ECFP4. It can be observed that the data set distributed between -30 and 30 of ECFP4 of TNSE-1 and -40 and 40 of ECFP4 of TNSE-2 on the horizontal and vertical coordinates.

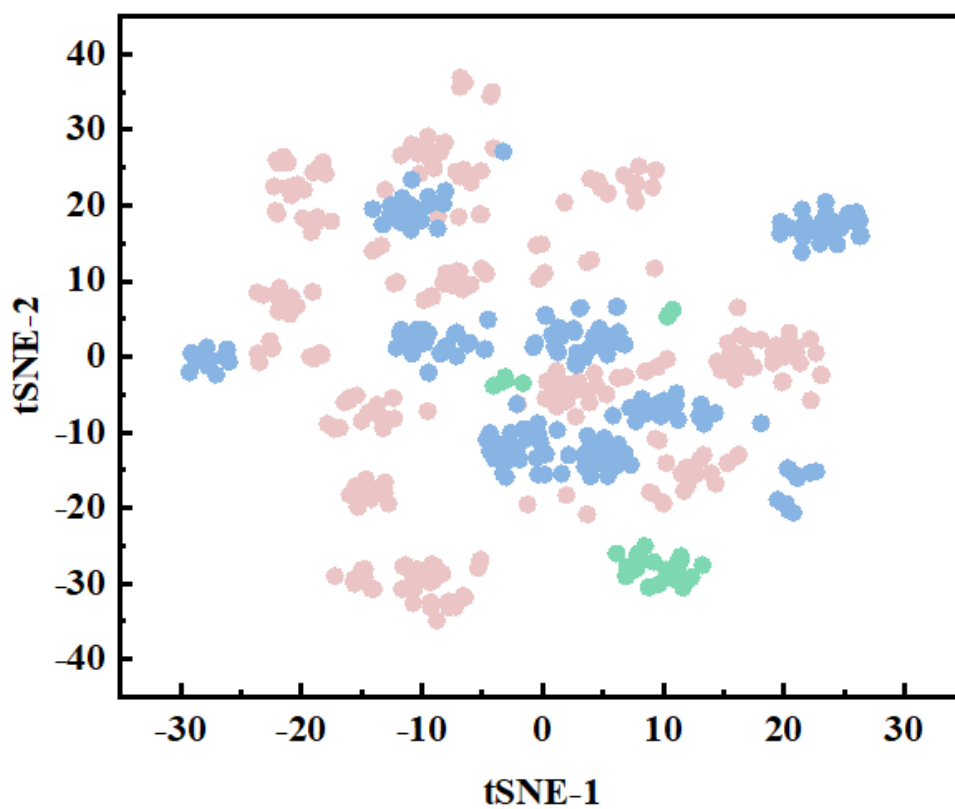

Figure. S3 The scatter plots of experimental pIC50 versus in silico prediction of the EGFR target by the SVM-GBDT and the SVM-DT. It can be observed that the points do not deviate too far from the regression line in figure s3, which shows the accuracy of the prediction.

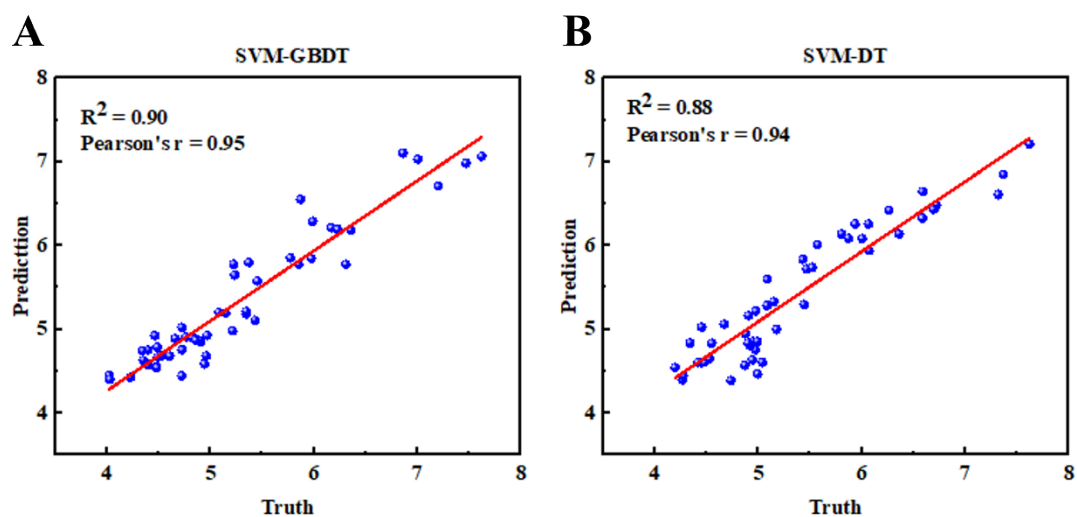

Figure. S4 Swarm plots of SHAP values. Shapley additive explanations (SHAP) analysis for the top 20 features in four machine-learning methods. The position of dots in the horizontal location represents whether the effect of that feature value contributed positively or negatively. The color of the dots from blue to pink represents the importance of features.

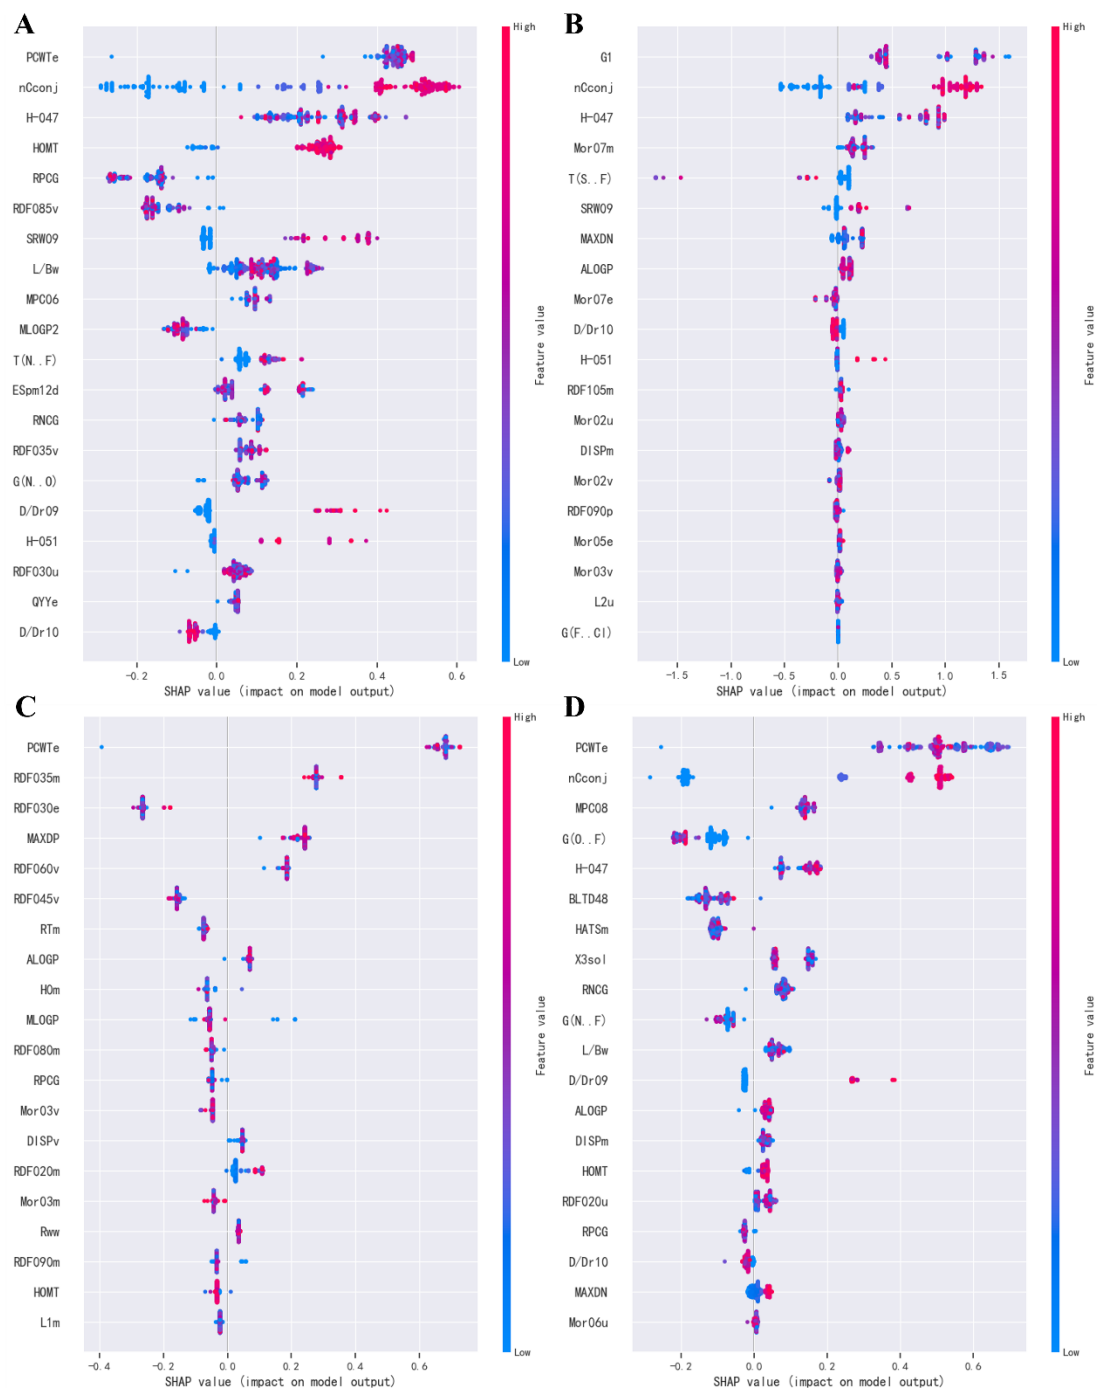



Figure. S5 The docking results of the four top-ranked exclude the highest. (A) (No.5) Four hydrogen bonding interactions with amino acid residues (LYS708, TYR915, LYS929, and GLU931) are shown. Five hydrophobic interactions with amino acid residues (TYR915, ASP916, ILE926, GLU931, and PRO934) are found. (B) (No.19) Five hydrogen bonding interactions with amino acid residues (LEU704, ILE706, TYR944, GLU931, GLN935) are shown. Five hydrophobic interactions with amino acid residues (ARG705, LEU707, TYR915, LEU933, PRO934) are found. (C) (No.24) Three hydrogen bonding interactions with amino acid residues (ILE706, ARG705, GLN935) are shown. Five hydrophobic interactions with amino acid residues (LEU703, PRO733, PRO934, GLN935) are found. (D) (No.26) Four hydrogen bonding interactions with amino acid residues (LEU718, ARG841, VAL843, THR854) are shown. Six hydrophobic interactions with amino acid residues (LEU718, VAL726, LEU792, LEU844, THR854) are found.

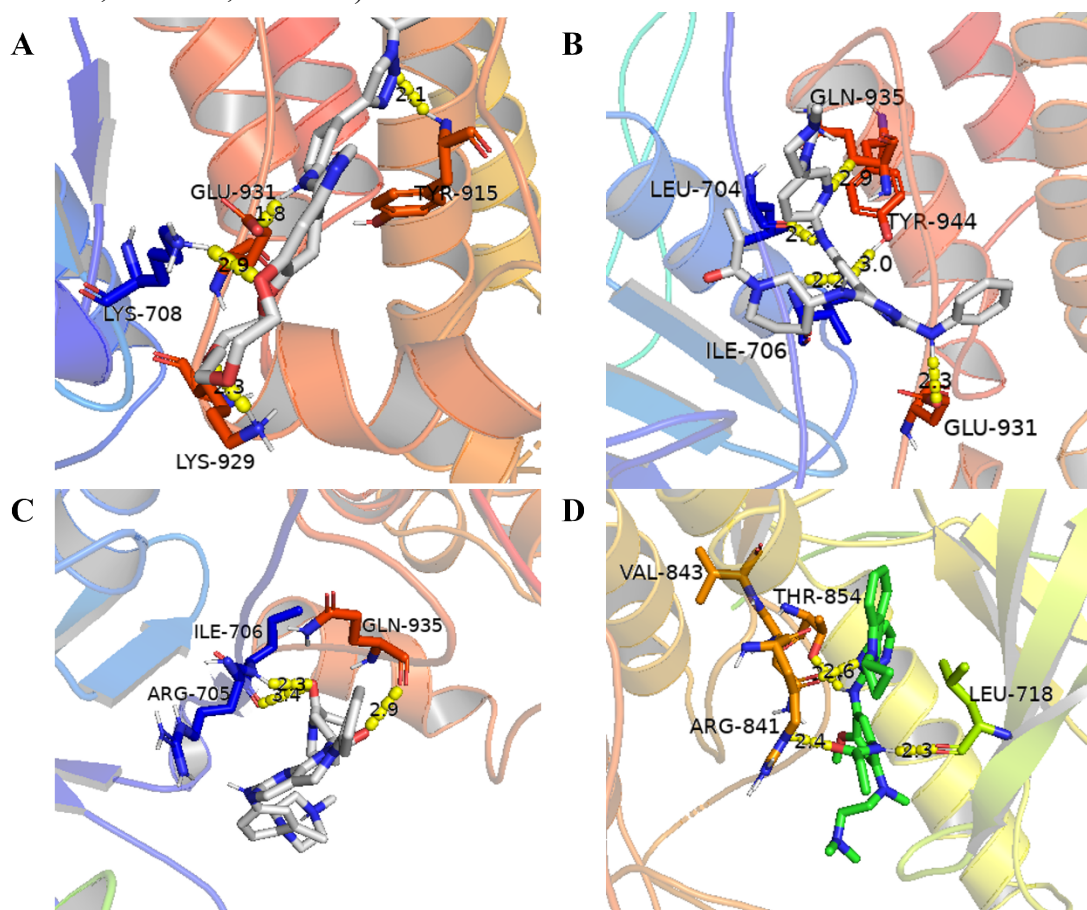

Supplement: d3nj03204c1.pdf [file d3nj03204c1.pdf]
